# Supplementary material for: Volatilome and Essential Oil of Ulomoides dermestoides: A Broad-Spectrum Medical Insect
Source: MDPI journal article supplement (doi:10.3390/molecules26206311), 2021-10-19
Supplement: s1 [file s1]

# Volatilome and Essential Oil of *Uromoides dermestoides*: A Broad-Spectrum Medical Insect.

Paulina J. Cázares-Samaniego <sup>1</sup>, Claudia G. Castillo <sup>1,\*</sup>, Miguel A. Ramos-López <sup>2</sup> and Marco M. González-Chávez <sup>3,\*</sup>

- 1 Coordinación para la Innovación de la Ciencia y la Tecnología (CIACYT), Facultad de Medicina, Universidad Autónoma de San Luis Potosí, Sierra Leona #550, Col. Lomas de San Luis, C.P.78210, San Luis Potosí, San Luis Potosí, México; xavet16@gmail.com (P.J.C.-S.), claudia.castillo@uaslp.mx (C.G.C.)
  - 2 Facultad de Química, Universidad Autónoma de Querétaro, Cerro de las Campanas s/n, Col. Las Campanas, C.P. 76010, Santiago de Querétaro, Querétaro, México; miguel.angel.ramos@uaq.mx
  - 3 Facultad de Ciencias Químicas, Centro de Investigación y Estudios de Posgrado, Universidad Autónoma de San Luis Potosí, Dr. Manuel Nava Martínez #6, Zona Universitaria, C.P.78210, San Luis Potosí, San Luis Potosí, México; gcomm@uaslp.mx
- \* Correspondence: M.M.G.-C. gcomm@uaslp.mx; Tel.: +52 4448262300 Ext. 2471; C.G.C. claudia.castillo@uaslp.mx Tel.: +52 4448262300 Ext. 8482

## SUPPORTING INFORMATION

### List of Contents

|                                                                                                                             |   |
|-----------------------------------------------------------------------------------------------------------------------------|---|
| <b>Figure S1.</b> Gas chromatogram of the HS-SPME (CAR/PDMS fiber) at 1h of <i>U. dermestoides</i> under T1 treatment. .... | 2 |
| <b>Figure S2.</b> Gas chromatogram of the HS-SPME (PEG fiber) at 1h of <i>U. dermestoides</i> under T1 treatment.....       | 2 |
| <b>Figure S3.</b> Gas chromatogram of the HS- SPME (CAR/PDMS fiber) at 1h of <i>U. dermestoides</i> under T2 stimuli. ....  | 2 |
| <b>Figure S4.</b> Gas chromatogram of the HS- SPME (PEG fiber) at 1h of <i>U. dermestoides</i> under T2 stimuli. ....       | 3 |
| <b>Figure S5.</b> Gas chromatogram of <i>U. dermestoides</i> essential oil under T1 stimuli (EOT1)...                       | 3 |
| <b>Figure S6.</b> Gas chromatogram of <i>U. dermestoides</i> essential oil under T2 stimuli (EOT2)...                       | 3 |

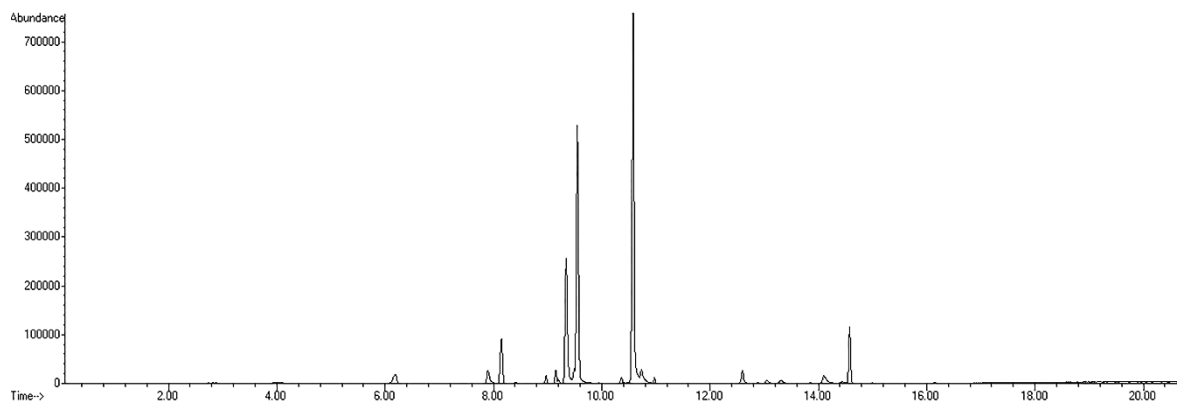

**Figure S1.** Gas chromatogram of the HS-SPME (CAR/PDMS fiber) at 1h of *U. dermestoides* under T1 treatment.

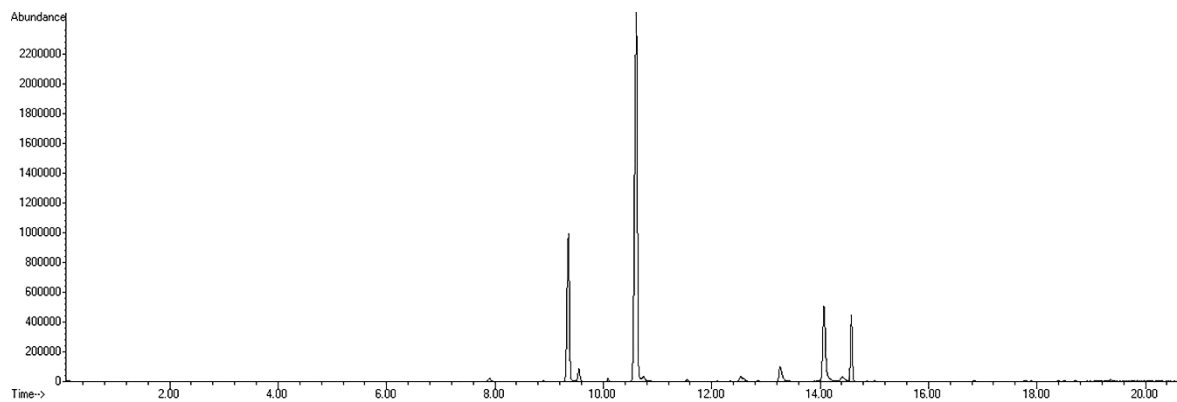

**Figure S2.** Gas chromatogram of the HS-SPME (PEG fiber) at 1h of *U. dermestoides* under T1 treatment.

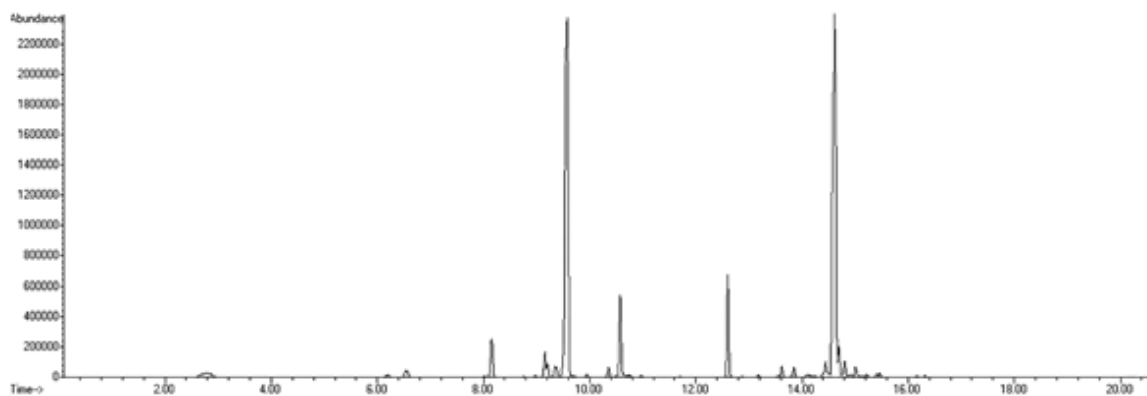

**Figure S3.** Gas chromatogram of the HS- SPME (CAR/PDMS fiber) at 1h of *U. dermestoides* under T2 stimuli.

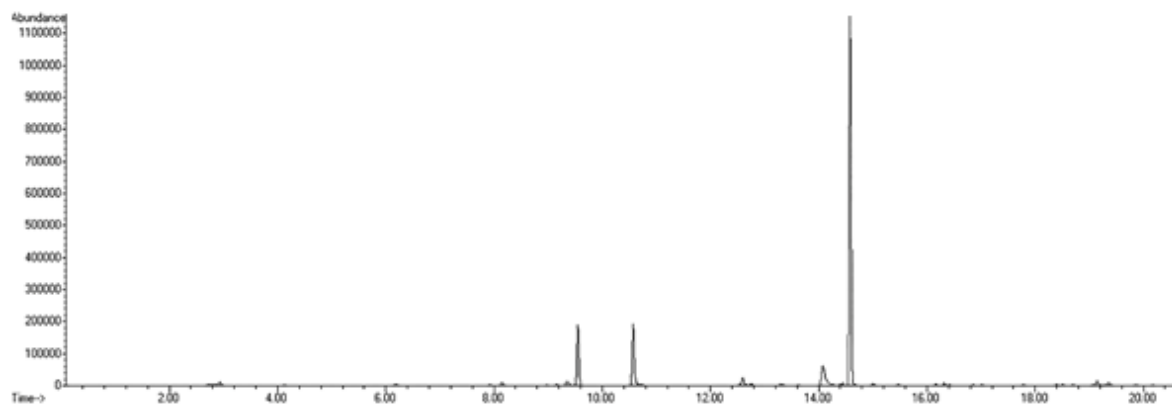

**Figure S4.** Gas chromatogram of the HS- SPME (PEG fiber) at 1h of *U. dermestoides* under T2 stimuli.

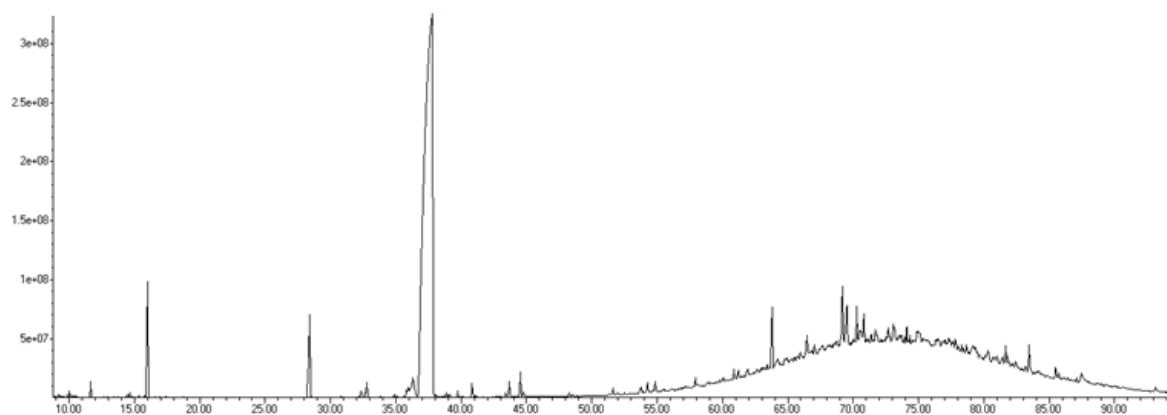

**Figure S5.** Gas chromatogram of *U. dermestoides* essential oil under T1 stimuli (EOT1).

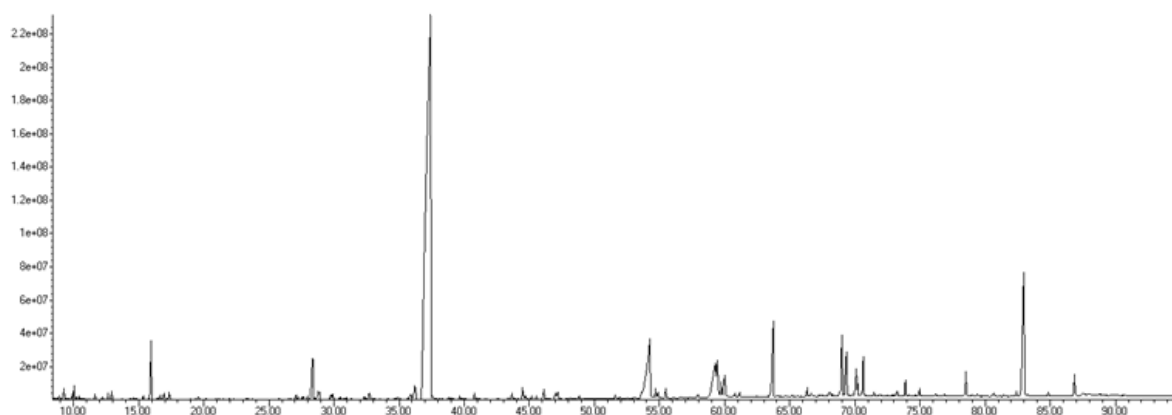

**Figure S6.** Gas chromatogram of *U. dermestoides* essential oil under T2 stimuli (EOT2).
